# Supplementary material for: A sensitive monoclonal antibody-based ELISA integrated with immunoaffinity column extraction for the detection of zearalenone in food and feed samples
Source: Royal Society of Chemistry journal article supplement (doi:10.1039/d3an01779f), 2023-12-02
Supplement: d3an01779f1.pdf [file d3an01779f1.pdf]

Supplemental materials

**A sensitive monoclonal antibody-based ELISA integrating with an  
immunoaffinity column extraction for the detection of  
zearalenone in food and feed samples**

Ting Wang<sup>a</sup>, Ting Zhou<sup>a</sup>, Kang Wu<sup>b\*</sup>, Junlin Cao<sup>a</sup>, Yuze Feng<sup>a</sup>, Jianguo Li<sup>a,\*</sup>,  
Anping Deng<sup>a,\*</sup>

<sup>a</sup> College of Chemistry, Chemical Engineering & Materials Science, Soochow  
University, Renai Road 199, Suzhou 215123, China

<sup>b</sup> School of Biology & Basic Medical Science, Soochow University, Renai Road  
199, Suzhou, 215123, China

\* Corresponding authors: Tel: +86 512 65884630; Fax: +86 512 65884630

e-mail: wukang650202@163.com; lijgsd@suda.edu.cn;

denganping@suda.edu.cn

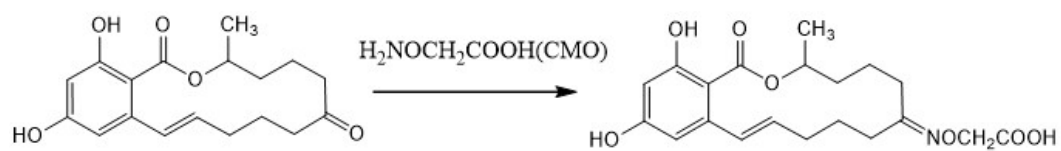

Fig. S1. Synthesis of ZEN-CMO

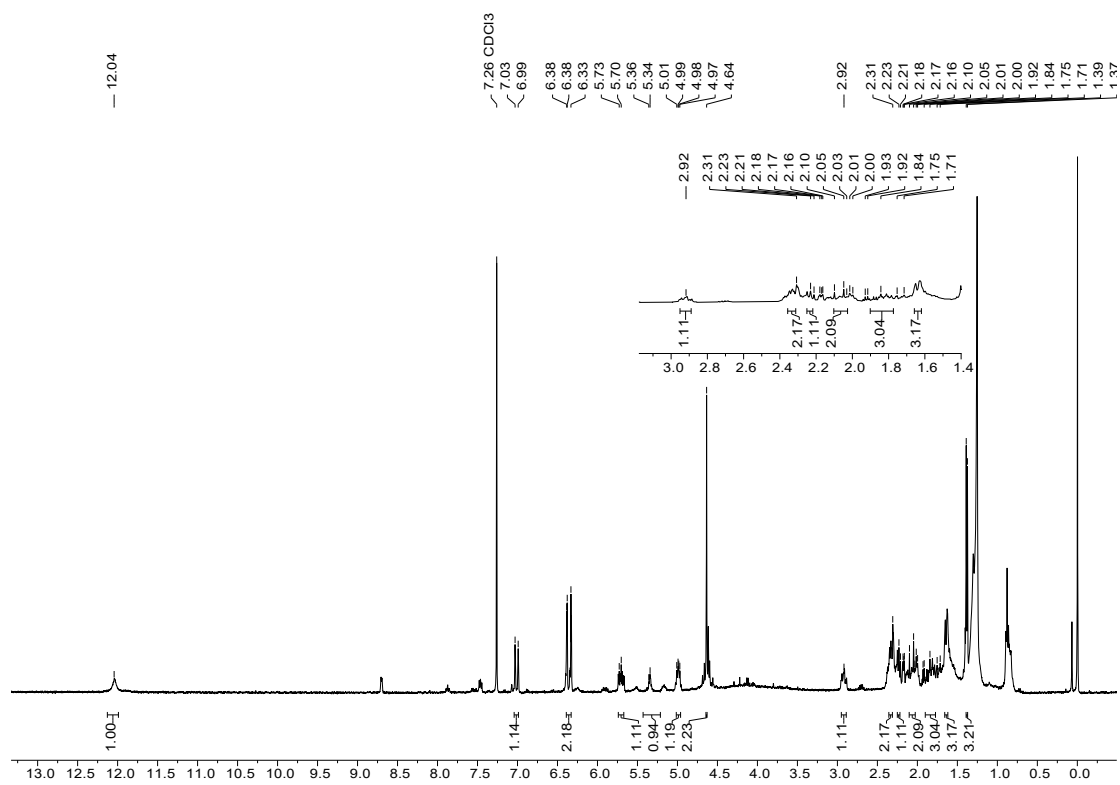

Fig. S2. NMR spectrum of ZEN-COM

Table S1. The contents of ZEN in 12 real samples measured by ELISA

| Sample <sup>a</sup> | Conc. Measured<br>±SD (ng/g) | RSD (%)<br>(n=3) |
|---------------------|------------------------------|------------------|
| 1                   | 52.62 ± 4.43                 | 8.42             |
| 2                   | 53.97 ± 3.72                 | 6.45             |
| 3                   | 54.93 ± 2.22                 | 3.70             |
| 4                   | 54.60 ± 2.55                 | 4.58             |
| 5                   | 66.28 ± 5.73                 | 8.65             |
| 6                   | 127.07 ± 6.17                | 4.20             |
| 7                   | 33.33 ± 2.42                 | 6.92             |
| 8                   | 173.78 ± 13.43               | 7.73             |
| 9                   | 168.68 ± 10.52               | 5.96             |
| 10                  | 277.67 ± 14.67               | 4.57             |
| 11                  | 214.47 ± 10.47               | 4.88             |
| 12                  | 458.23 ± 44.73               | 9.76             |

<sup>a</sup> Samples 1-4, 5-8 and 9-12 are the corn flour, wheat flour and animal feed samples purchased from the local market.
